# Supplementary material
Source: PubMed Central journal article supplement (PMC8501804)
Supplement: pnas.2110036118.sapp.pdf [file pnas.2110036118.sapp.pdf]

## Supplementary Information

# **Robust Wrinkled MoS<sub>2</sub>/N-C Bifunctional Electrocatalysts Interfaced with Single Fe Atoms for Wearable Zinc-Air Batteries**

Yan Yan,<sup>1,2</sup> Shuang Liang,<sup>1</sup> Xiang Wang,<sup>3</sup> Mingyue Zhang,<sup>1</sup> Shu-Meng Hao,<sup>1</sup> Xun Cui,<sup>1</sup> Zhiwei  
Li,<sup>4</sup> and Zhiqun Lin<sup>1\*</sup>

1. School of Materials Science and Engineering, Georgia Institute of Technology, Atlanta, GA 30332, USA

2. School of Chemistry & Materials Science, Jiangsu Key Laboratory of Green Synthetic Chemistry for Functional Materials, Jiangsu Normal University, Xuzhou 221116, China.

3. Chemical Sciences Division, Oak Ridge National Laboratory, Oak Ridge, TN, 37831, USA.

4. Shenzhen Cloud Computing Center, National Supercomputing Center, Shenzhen 518055, China.

\*Corresponding Authors: [zhiqun.lin@mse.gatech.edu](mailto:zhiqun.lin@mse.gatech.edu)

## Experimental Section

### 1. Materials

Ammonium molybdate ( $(\text{NH}_4)_6\text{Mo}_7\text{O}_{24}\cdot 4\text{H}_2\text{O}$ , 99%), dicyandiamide ( $\text{C}_2\text{H}_4\text{N}_4$ , 99%) and iron (III) chloride hexahydrate ( $\text{FeCl}_3\cdot 6\text{H}_2\text{O}$ , 99%) were purchased from Alfa Aesar. Thiourea ( $\text{NH}_2\text{CSNH}_2$ , 99%), Polyvinyl Pyrrolidone (PVP,  $M_w\sim 55000$  Da), dopamine hydrochloride ( $\text{C}_8\text{H}_{12}\text{ClNO}_2$ , 99%) was purchased from Sigma-Aldrich. Commercial Pt/C (20wt%) catalyst was purchased from Sigma-Aldrich. Commercial Ir/C (20wt%) catalyst was purchased from Premetek Co. All chemicals were used as received without further purification

### 2. Preparation of $\text{MoS}_2$ nanospheres (denoted $\text{MoS}_2$ NSs)

In a typical reaction, 617 mg (0.5 mmol) ammonium molybdate ( $(\text{NH}_4)_6\text{Mo}_7\text{O}_{24}\cdot 4\text{H}_2\text{O}$ ), 533 mg (7 mmol) thiourea ( $\text{NH}_2\text{CSNH}_2$ ), and 300 mg (0.005 mmol) surfactant PVP were dissolved in 17 mL of deionized water under vigorous stirring to form a homogeneous solution. Then, the solution was transferred into a 50 mL Teflon-lined stainless steel autoclave and kept at 220 °C for 18 h. After being cooled to room temperature, the generated precipitates were centrifuged and washed with water and ethanol several times. The final products were dried at 50 °C under vacuum for 12 h.

### 3. Preparation of polydopamine coated $\text{MoS}_2$ NSs ( $\text{MoS}_2@\text{PDA}$ NSs)

The  $\text{MoS}_2$  NS coated with PDA (denoted  $\text{MoS}_2@\text{PDA}$ ) were synthesized by polymerization of dopamine in Tris buffer (pH 8.5). In a typical procedure, 100 mg  $\text{MoS}_2$  NS was dispersed in 20 mL Tris buffer (pH 8.5), and 20 mg dopamine hydrochloride was added in the solution to form a mixture. The mixture was stirred at room temperature for 15 h, and the suspension was centrifuged and washed with water several times. The final products were dried at room temperature under vacuum for 12 h.

### 4. Preparation of $\text{MoS}_2@\text{Fe-N-C}$ NSs, $\text{MoS}_2@\text{Co-N-C}$ NSs and $\text{MoS}_2@\text{Ni-N-C}$ NSs

The  $\text{MoS}_2$  NS covered with atomic Fe, N-co-doped carbon shell was crafted according to the following steps. 250 mg dicyandiamide (DICY) was dispersed into 10 mL deionized water containing 50 mg  $\text{FeCl}_3$ , forming a uniform solution. 100 mg of  $\text{MoS}_2@\text{PDA}$  was then introduced into the above solution and stirred for 3 h. Afterwards, the obtained suspension was vacuum-dried at 50 °C, followed by heat treatment at 800 °C for 2 h under  $\text{N}_2$  atmosphere.

Likewise,  $\text{MoS}_2@\text{Co-N-C}$  NSs and  $\text{MoS}_2@\text{Ni-N-C}$  NSs were also crafted using the same procedure, in which  $\text{FeCl}_3$  was replaced with  $\text{CoCl}_2$  and  $\text{NiCl}_2$ , respectively.

### 5. Characterization

Scanning electron microscopy (SEM) measurements were performed using a field emission source operated at an accelerating voltage of 15 kV by JEOL JSM-6700F. The elemental mapping was recorded using energy dispersive X-ray spectrometry (EDS) with the abovementioned SEM.

The transmission electron microscopy (TEM, JEM-100CX11 microscope, 100 kV) and high-resolution TEM (HRTEM, Hitachi HD-2700) samples were prepared by dispersing products of interest in ethanol via ultrasonication, followed by the deposition on a carbon film-supported copper grid. Powder X-ray diffraction (XRD, Rigaku D/max-2400) measurements were conducted using Cu-K $\alpha$  radiation (40 kV, 120 mA) with a step of 0.08° per 25 s and a 2 $\theta$  range of 10-80°. Raman spectroscopy study was performed on a Renishaw InVia Raman spectrometer equipped with a 532 nm laser. Fourier transform infrared (FTIR) spectra were collected by JASCO FTIR 6300. X-ray photoelectron spectroscopy (XPS) measurements were carried out on a Thermo K-alpha electron spectrometer with Al K $\alpha$  radiation. XAFS measurements were performed at the beamline 10ID-B of the Advanced Photon Source at Argonne National Laboratory. Spectra were collected at Fe K-edge (eV) in transmission mode with each Fe<sub>2</sub>O<sub>3</sub> and Fe foil collected simultaneously and used as the reference for energy calibration as well as data analysis.

## 6. Electrochemical Measurements

The catalyst ink recipe was mildly sonicated overnight and optimized for homogeneity before being coated on a mirror-polished glassy carbon working electrode (0.196 cm<sup>2</sup>). To avoid mass transport limitation, which is often caused by nonuniform catalyst film, a homogeneous film was ensured by drying the catalyst ink (10  $\mu$ L) on the electrode at room temperature. Commercially acquired Ir/C and Pt/C (20 wt%) were used as reference catalysts. A graphite rod (99.999%) was used as the counter electrode and Ag/AgCl as reference electrode. The measured potentials are referred to the RHE,  $E_{\text{RHE}} = E_{\text{Ag/AgCl}} + 0.059\text{pH} + E^{\circ}_{\text{Ag/AgCl}}$ . Koutechy-Levich plots ( $J^{-1}$  vs.  $\omega^{-1}$ ) in the inset of **Figure 4d** were analyzed at various electrode potentials. The slopes of their best linear fit lines were used to calculate the number of electrons transferred ( $n$ ) based on the equation below.

$$\frac{1}{J} = \frac{1}{J_L} + \frac{1}{J_K} = \frac{1}{B\omega^{\frac{1}{2}}} + \frac{1}{J_K} \quad (\text{S1})$$

$$B = 0.62nFC_0(D_0)^{\frac{2}{3}}\nu^{-\frac{1}{6}} \quad (\text{S2})$$

$$J_K = nFkC_0 \quad (\text{S3})$$

where  $J$  is the measured current density;  $J_K$  and  $J_L$  are the kinetic- and diffusion-limiting current densities, respectively;  $\omega$  is the angular velocity;  $n$  is the transferred electron number;  $F$  is the Faraday constant;  $C_0$  is the bulk concentration of O<sub>2</sub>;  $\nu$  is the kinematic viscosity of the electrolyte; and  $k$  is the electron-transfer rate constant.

The ORR polarization curves were recorded in 0.1 M KOH at the scan rate of 5 mV s<sup>-1</sup> at room temperature on a three-electrode workstation. The OER polarization curves were tested in 1 M KOH. Bifunctional ORR and OER properties were evaluated in 0.1 m KOH solution at room temperature. Any capacitive current contributions were eliminated via iR correction by deducting the background current from the measured currents.

The air-cathodes for primary Zn-air battery (ZAB) were prepared by coating the catalysts (0.25 mg cm<sup>-2</sup>) on a hydrophobic carbon cloth and evaluated in 6 m KOH electrolyte containing 0.2 M ZnAc. The fabricated all-solid-state battery and liquid-state electrolyte battery were assembled and tested under ambient conditions. No inert atmosphere or glove box was used.

## 7. Assembly and Test of Wearable Solid-State Zn-Air Batteries (ZABs)

The wearable solid-state Zn-air battery (ZAB) was fabricated in a sandwich structure. Particularly, a polished zinc foil (0.05 mm thickness), the catalysts coated carbon cloth (0.25 mg cm<sup>-2</sup>) and a polyvinyl alcohol (PVA) gel were used as anode, air electrode and solid electrolyte, respectively. The gel polymer electrolyte was prepared as follows: polyvinyl alcohol (PVA, 5 g) was dissolved in 50 mL 18 M KOH at 95 °C to form a homogeneous viscous solution, followed by casting on a glass disk to form a thin polymer film. The film was then frozen in a freezer at -20 °C about 2 h, and then kept at 0 °C for 4 h. The film was thawed for 12 h prior to use. The air electrode (cathode) was prepared as follows: the as-prepared catalysts or Pt/C+Ir/C (1:1), carbon black (CB) and polyvinylidene fluoride (PVDF) with mass ratio of 8:1:1 was well-dispersed in dimethylpyrazole (200 mg mL<sup>-1</sup>) to form a homogeneous suspension. Then, the suspension was casted onto carbon cloth with a mass loading of 0.25 mg cm<sup>-2</sup>. The samples were dried at room temperature before test. Then, cathode and anode were placed on the two sides of PVA gel. And a glass fiber separator was used between the gel electrolyte and flexible cathode, in order to prevent the contact between the soft cathode and anode. All tests for the wearable Zn-air battery were performed on a battery test station (Land). Cycling test was performed using recurrent galvanostatic pulses for 10 min of discharge, followed by 10 min of charge.

The power density (mW cm<sup>-2</sup>) was calculated according to the equation:

$$\text{current density} \times \text{discharge voltage} \quad (\text{S4})$$

The specific capacity (mAh g<sup>-1</sup>) was calculated according to the equation:

$$\frac{\text{current density} \times \text{service hours}}{\text{weight of consumed zinc}} \quad (\text{S5})$$

The energy density (Wh kg<sup>-1</sup>) was calculated according to the equation:

$$\frac{\text{current density} \times \text{service hours} \times \text{average discharge voltage}}{\text{weight of consumed zinc}} \quad (\text{S6})$$

## 8. Assembly and Test of Liquid ZABs

The as-prepared catalysts and Pt/C + Ir/C based air-cathodes were used to assemble rechargeable ZABs. Zn plate (0.2 mm thickness) was used as the anode, and 6.0 M KOH electrolyte was filled between the cathode and anode. To build the rechargeable ZABs, 6.0 M KOH with 0.2 M zinc acetate was used as the electrolyte, where the zinc acetate was added to ensure reversible Zn electrochemical reactions at the anode. The method of preparing the air electrode is the same as the air electrode of solid-states ZABs. The Zn plate layer and catalyst layer have an effective area of 1.766 cm<sup>2</sup> and allows O<sub>2</sub> from ambient air to reach the catalyst sites. All tests for the wearable Zn-air battery were performed on a battery test station (Land). Cycling test was conducted using recurrent galvanostatic pulses for 1 h of discharge, followed by 1 h of charge.

## 9. Computational Methods

All density functional theory (DFT) calculations were implemented in the Vienna Ab initio Simulation Package (VASP).(1) The generalized gradient approximation (GGA) with Perdew-Burke-Ernzerhof (PBE) functional and the projector augmented wave (PAW) potential were used to describe the exchange-correlation energy and the electron-ion interaction, respectively.(2, 3) To ensure the accuracy of calculated results, the energy cutoff for the plane wave basis was set to 450 eV. The energy tolerance for self-consistency was set to 10<sup>-5</sup> eV. The force tolerance for atomic

relaxation was set to be 0.001 eV/Å.

The MoS<sub>2</sub> model was constructed by 4 × 4 × 1 primitive MoS<sub>2</sub> cells with a = b = 12.66 Å and γ = 120°. For the MoS<sub>2</sub>@Fe-N-C model, to compensate for the lattice mismatch between MoS<sub>2</sub> (a = 3.16 Å) and graphene (a = 2.46 Å), we used a supercell comprising 4 × 4 primitive MoS<sub>2</sub> cells and 5 × 5 primitive graphene cells. For this supercell, the lattice mismatch is reduced to 1.9%. The Fe-N-C model was then constructed by embedding a FeN<sub>4</sub> site in a periodic 5 × 5 graphene. 4 × 4 × 1 Monkhorst-Pack k-points mesh was chosen.

The oxygen reduction reaction (ORR) and oxygen evolution reaction (OER) pathways on the considered models were calculated in details according to electrochemical framework developed by Norskov and his co-workers.<sup>(4, 5)</sup> In an alkaline electrolyte, the ORR is considered to proceed along the 4e<sup>-</sup> processes as follows:

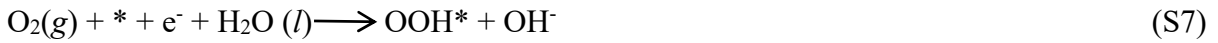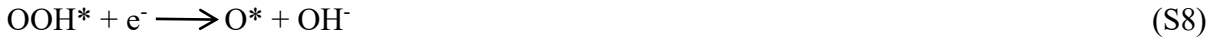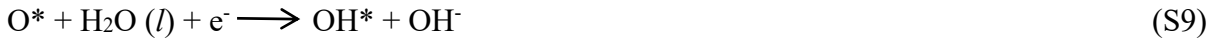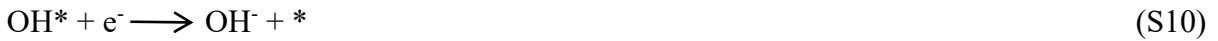

where \* represents an active site on the catalytic surface, (l) and (g) refer to liquid and gas phases, respectively.

The OER occurred through four elementary steps takes the reverse direction of the ORR shown above (Equation S7-S10).

The chemical potential for the reaction (H<sup>+</sup> + e<sup>-</sup>) (i.e., the free energy per H) is equal to that of 1/2 H<sub>2</sub> by setting the reference potential to be that of the standard hydrogen electrode at standard condition.

The reaction free energy ( $\Delta G$ ) is further calculated by the equation:

$$\Delta G = \Delta E + \Delta ZPE - T\Delta S - qU + k_B T \ln 10 * (pH) \quad (\text{S11})$$

where  $\Delta E$  is the reaction energy of reactant and product molecules adsorbed on catalyst surface, obtained from DFT calculation.  $\Delta ZPE$  and  $\Delta S$  are the change in zero-point energy and entropy in the reaction.  $U$  is the applied potential relative to RHE.  $q$  is the charge transfer in each elementary step.

## Figures and Tables

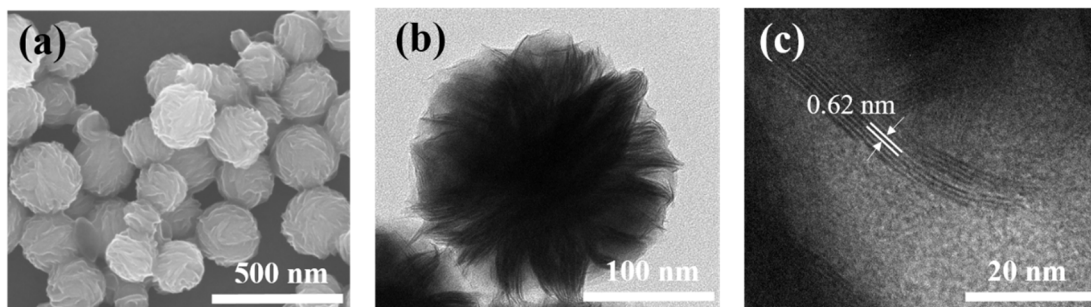

**Figure S1** (a) SEM image of MoS<sub>2</sub> nanospheres (NSs). TEM images of MoS<sub>2</sub> NSs at (b) low and (c) high magnifications, respectively.

Due to high surface energy of MoS<sub>2</sub> nanosheets, poly(vinylpyrrolidone) (PVP) is absorbed on the surface of MoS<sub>2</sub> nanosheets. The absorbed PVP surfactant can efficiently protect the 2D nanosheet structure from re-stacking. Subsequently, PVP on the surface of MoS<sub>2</sub> drives the radially-oriented assembly of MoS<sub>2</sub> nanosheets into MoS<sub>2</sub> nanospheres (NSs). After being thoroughly washed with water, ethanol, and acetone, the radially-oriented MoS<sub>2</sub> NS containing a few layers of MoS<sub>2</sub> are obtained.

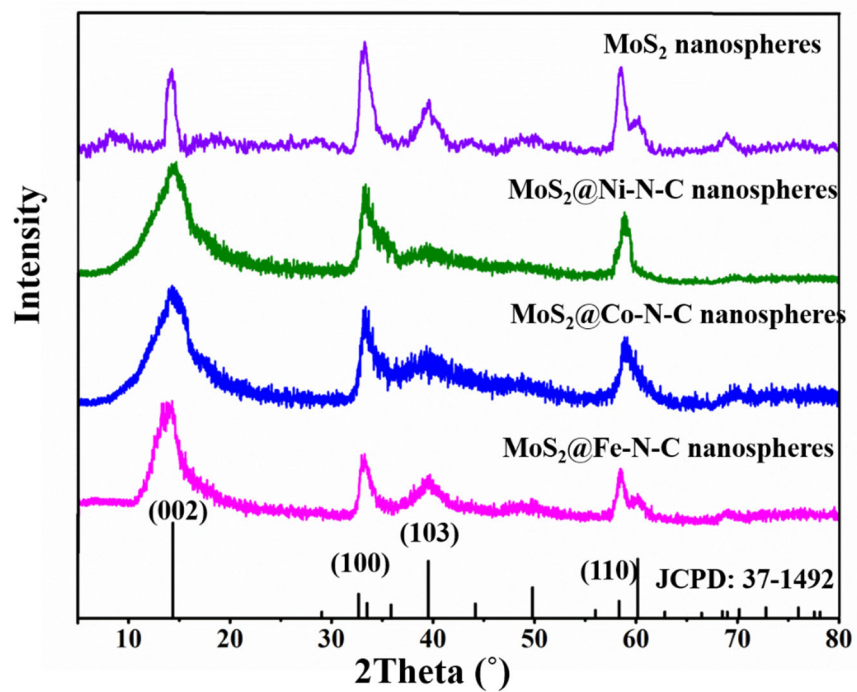

**Figure S2.** XRD pattern of MoS<sub>2</sub> NSs, MoS<sub>2</sub>@Ni-N-C NSs, MoS<sub>2</sub>@Co-N-C NSs, MoS<sub>2</sub>@Fe-N-C NSs, and the standard pattern of hexagonal MoS<sub>2</sub> (JCPDS card No. 37-1492), respectively.

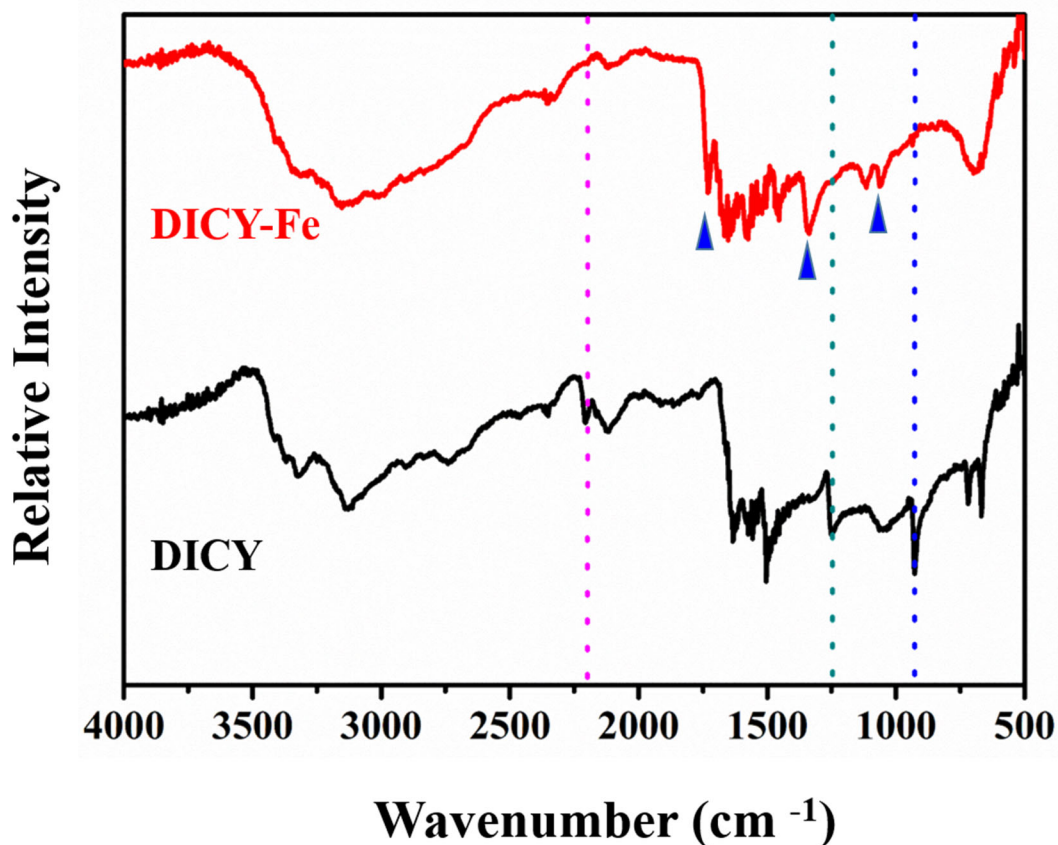

**Figure S3.** Fourier transform infrared (FTIR) spectra of DICY and DICY-Fe, respectively.

In the case of neat DICY (black curve), the absorption band at 2161–2209 cm<sup>-1</sup> can be attributed to the C≡N stretching vibration (pink dash line). The band observed at approximately 1243 cm<sup>-1</sup> is the typical C-N stretching vibration (green dash line). The absorption at 920 cm<sup>-1</sup> is characteristic out-of-plane bending vibration of N-H group (blue dash line). Clearly, in DICY-Fe (red curve), new peaks near 1742, 1329 and 1110 cm<sup>-1</sup> are presented, signifying the coordination interaction of Fe and DICY.



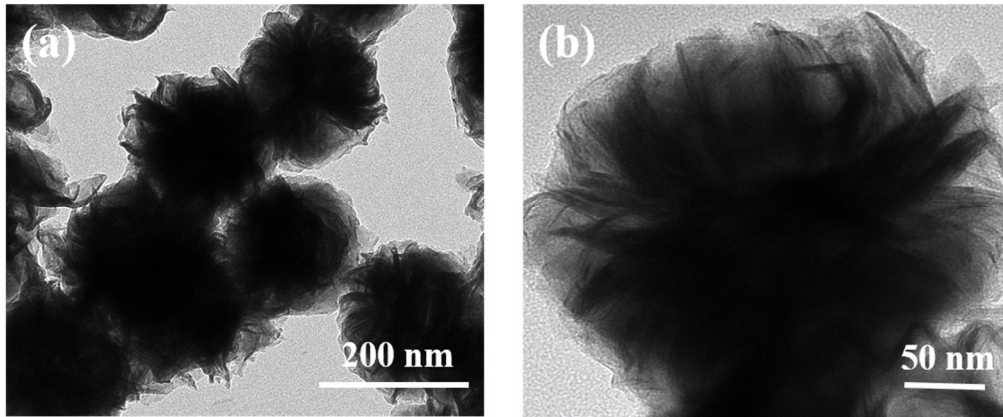

**Figure S4.** TEM images of MoS<sub>2</sub>@Fe-N-C NSs at (a) low and (b) high magnifications, respectively.

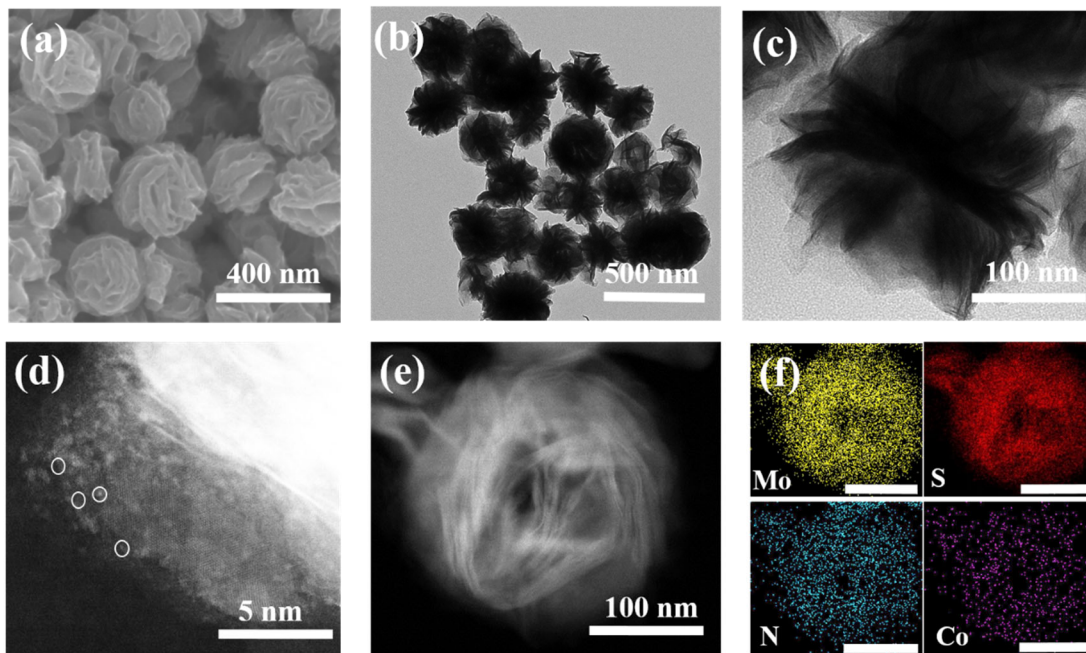

**Figure S5.** (a) SEM image and TEM images of MoS<sub>2</sub>@Co-N-C NSs at (b) low and (c) high magnifications, respectively. (d) Aberration-corrected (AC) HAADF-STEM image of MoS<sub>2</sub>@Co-N-C NS. (e) High angle annular dark field scanning TEM (HAADF-STEM) image and (f) element maps (Mo: yellow, S: red, N: blue, Co: purple; scale bar = 100 nm) of MoS<sub>2</sub>@Co-N-C NS.

The HAADF-STEM images of MoS<sub>2</sub>@Co-N-C NSs present atomically-dispersed species in the carbon substrate. The element mapping results reveal the homogeneous distribution of Mo, S, N and Co elements in the respective NSs (**Figure S5f**). These results suggest that single Co atoms were successfully anchored on the N-doped carbon matrix.

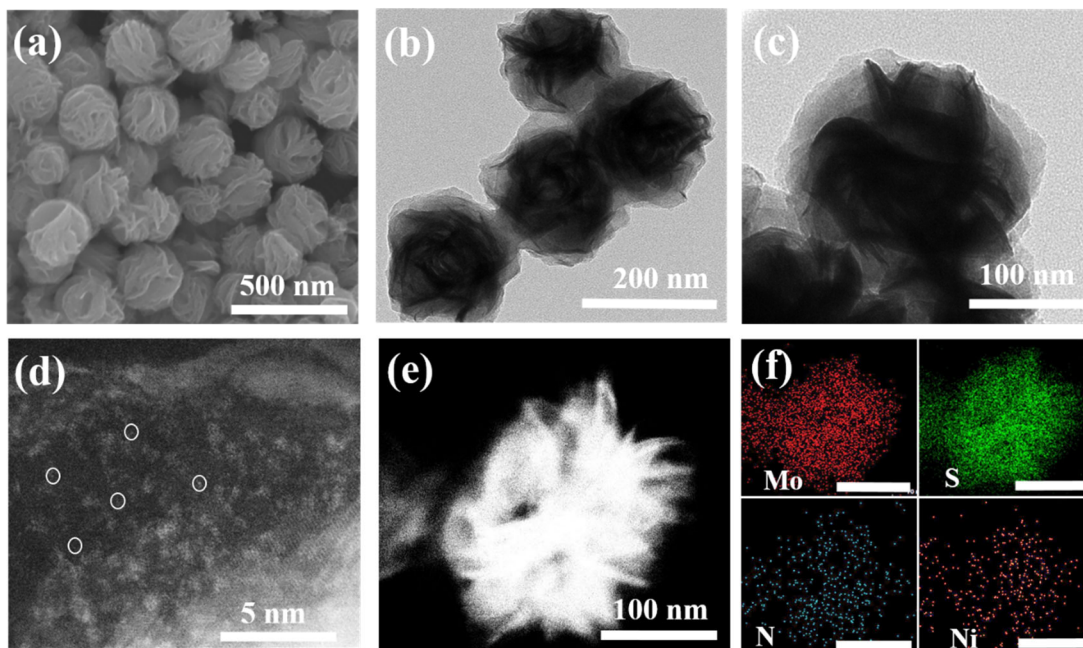

**Figure S6.** (a) SEM image and TEM images of MoS<sub>2</sub>@Ni-N-C NSs at (b) low and (c) high magnifications, respectively. (d) Aberration-corrected (AC) HAADF-STEM image of MoS<sub>2</sub>@Ni-N-C NS. (e) High angle annular dark field scanning TEM (HAADF-STEM) image and (f) element maps (Mo: red, S: green, N: blue, Ni: orange; scale bar = 100 nm) of MoS<sub>2</sub>@Ni-N-C NS.

The HAADF-STEM images of MoS<sub>2</sub>@Ni-N-C NSs present atomically-dispersed species in the carbon substrate. The element mapping results reveal the homogeneous distribution of Mo, S, N and Ni elements in the respective NSs (**Figure S6f**). These results suggest that single Ni atoms were successfully anchored on the N-doped carbon matrix.

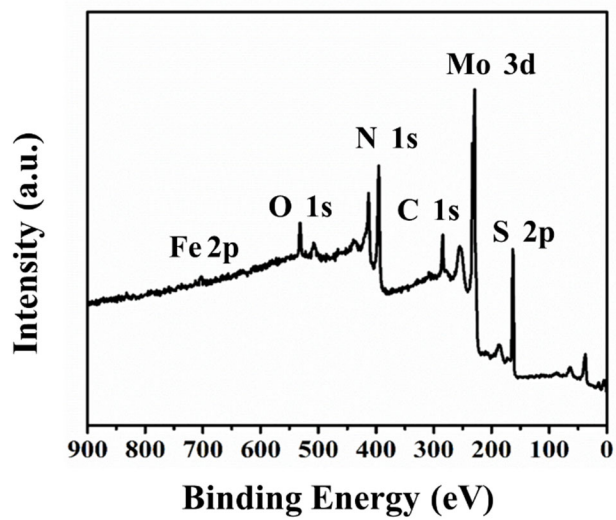

**Figure S7.** XPS survey spectrum of MoS<sub>2</sub>@Fe-N-C NSs.

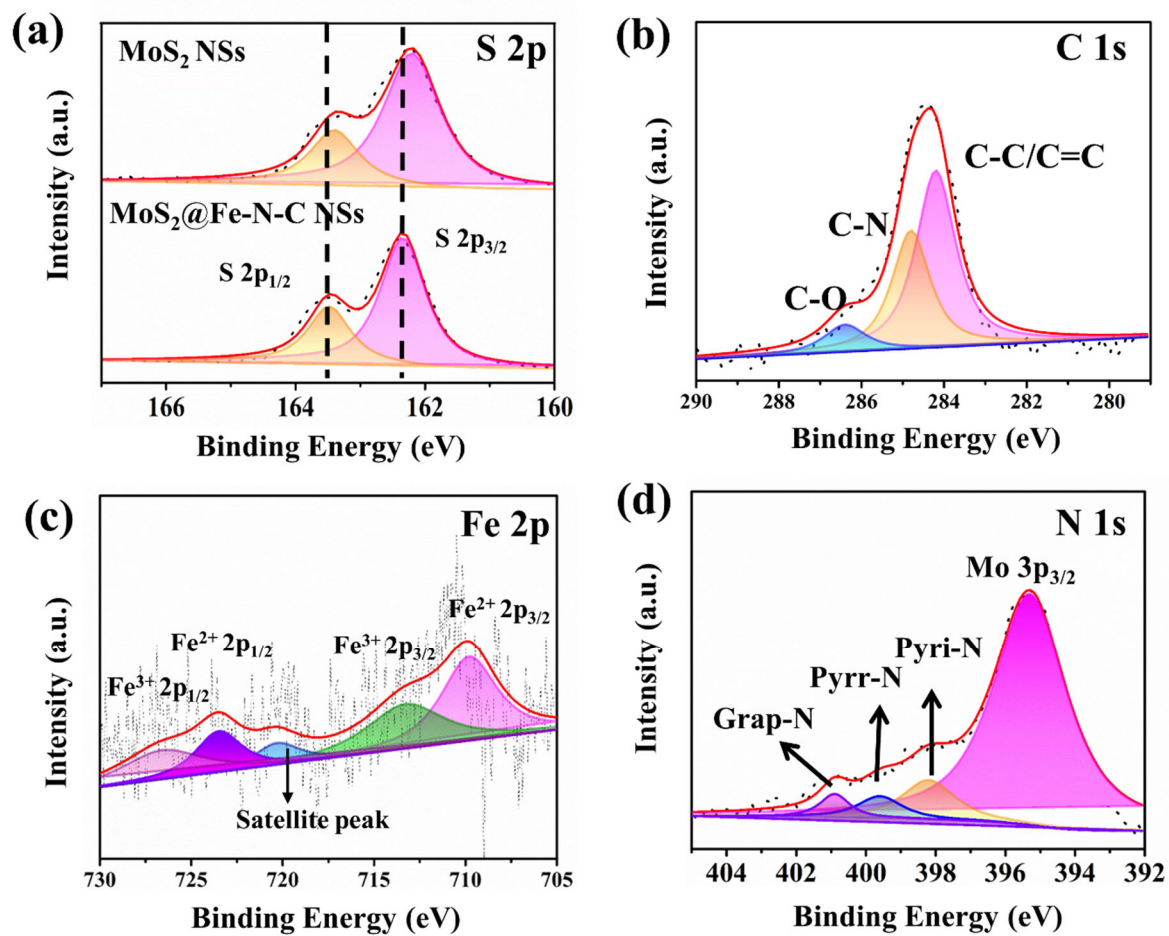

**Figure S8.** High-resolution (a) S 2p, (b) C 1s, (c) Fe 2p, and (d) N 1s XPS spectra, respectively.

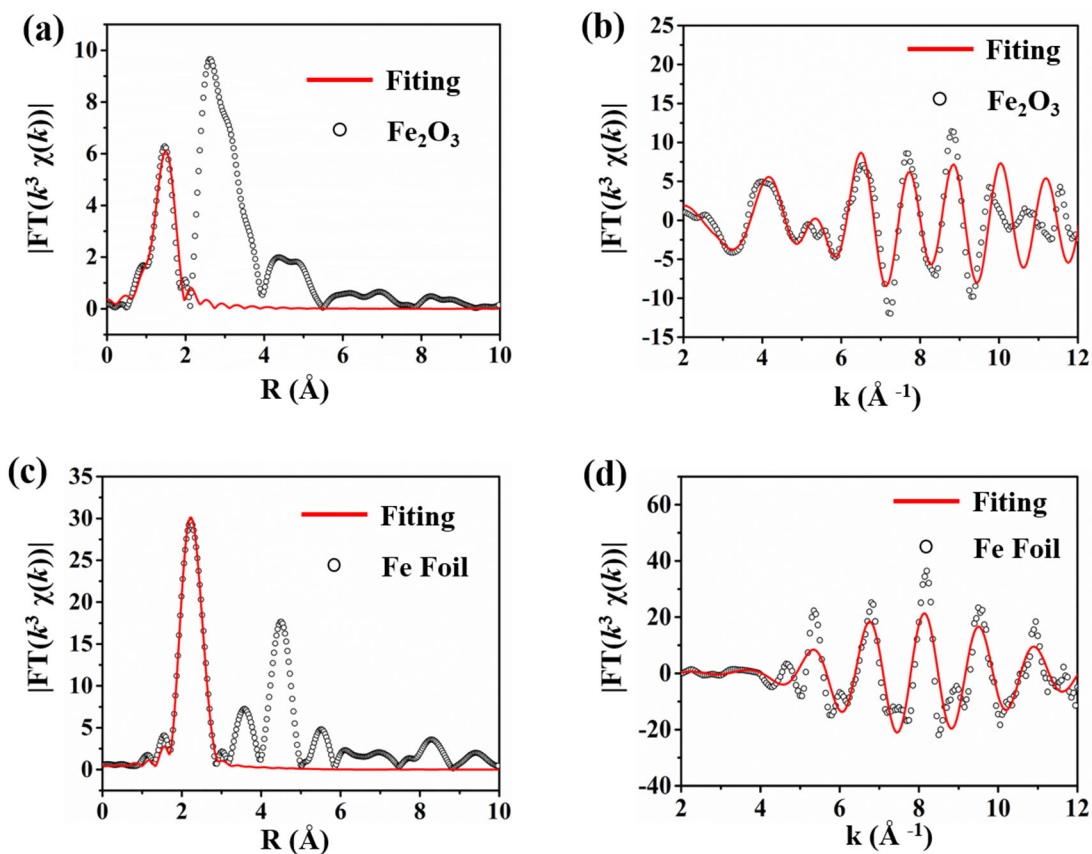

**Figure S9** (a) The corresponding extended X-ray absorption fine structure (EXAFS) R space fitting curve of  $\text{Fe}_2\text{O}_3$ . (b) The corresponding EXAFS k space fitting curve of  $\text{Fe}_2\text{O}_3$ . (c) The corresponding EXAFS R space fitting curve of Fe foil. (d) The corresponding EXAFS k space fitting curve of Fe foil.

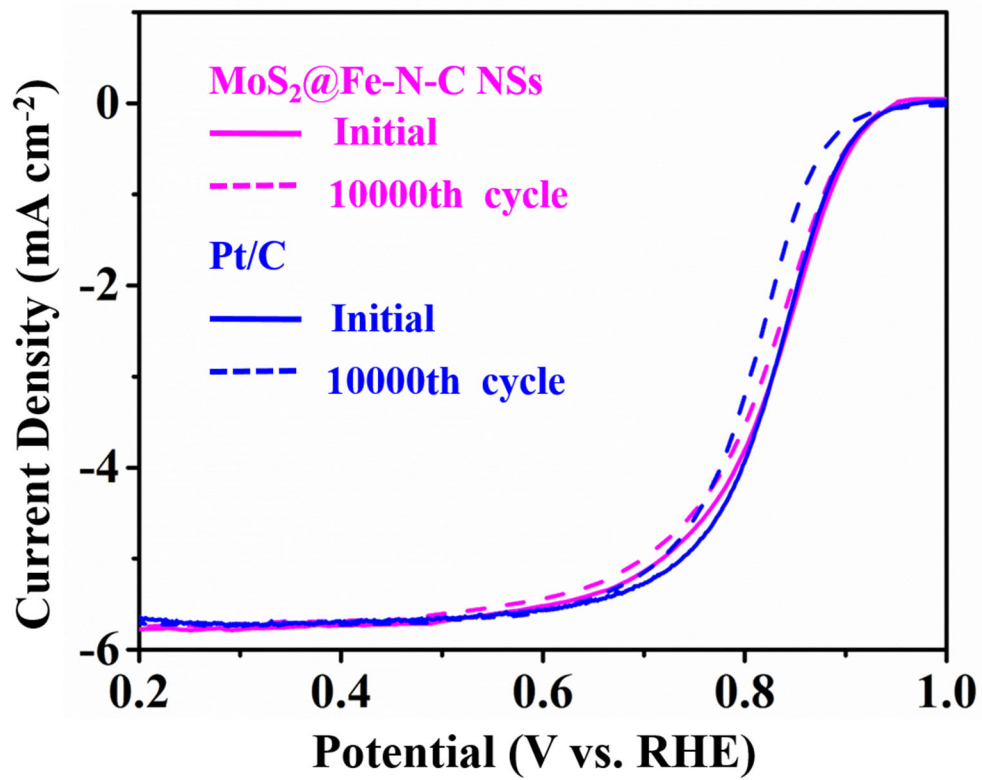

**Figure S10.** Polarization curves of MoS<sub>2</sub>@Fe-N-C NSs and Pt/C before and after 10000 potential sweeps at 50 mV s<sup>-1</sup> for ORR test.

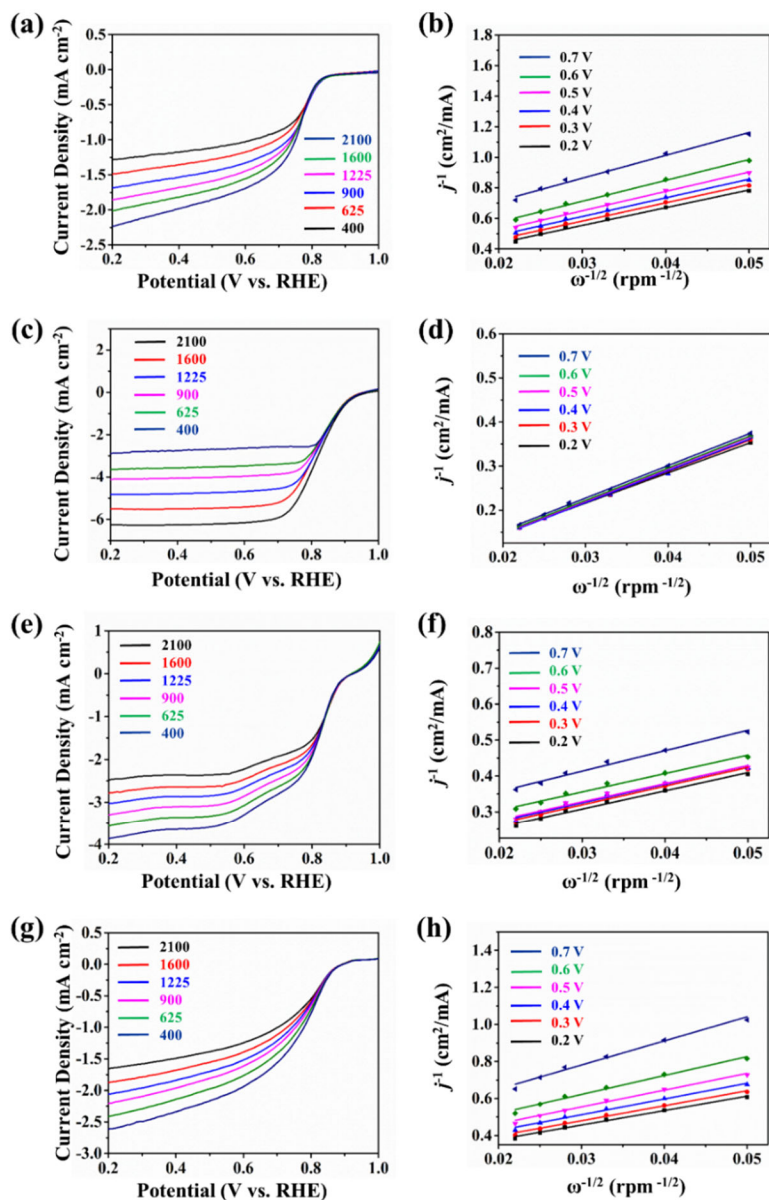

**Figure S11.** (a) Rotating disk electrode (RDE) polarization curves at different rotating speeds and (b) the corresponding Koutechy-Levich plots for MoS<sub>2</sub> NSs. (c) RDE polarization curves at different rotating speeds and (d) the corresponding Koutechy-Levich plots for MoS<sub>2</sub>@Fe-N-C NSs. (e) RDE polarization curves at different rotating speeds and (f) corresponding Koutechy-Levich plots for MoS<sub>2</sub>@Co-N-C NSs. (g) RDE polarization curves at different rotating speeds and (h) the corresponding Koutechy-Levich plots for MoS<sub>2</sub>@Ni-N-C NSs.



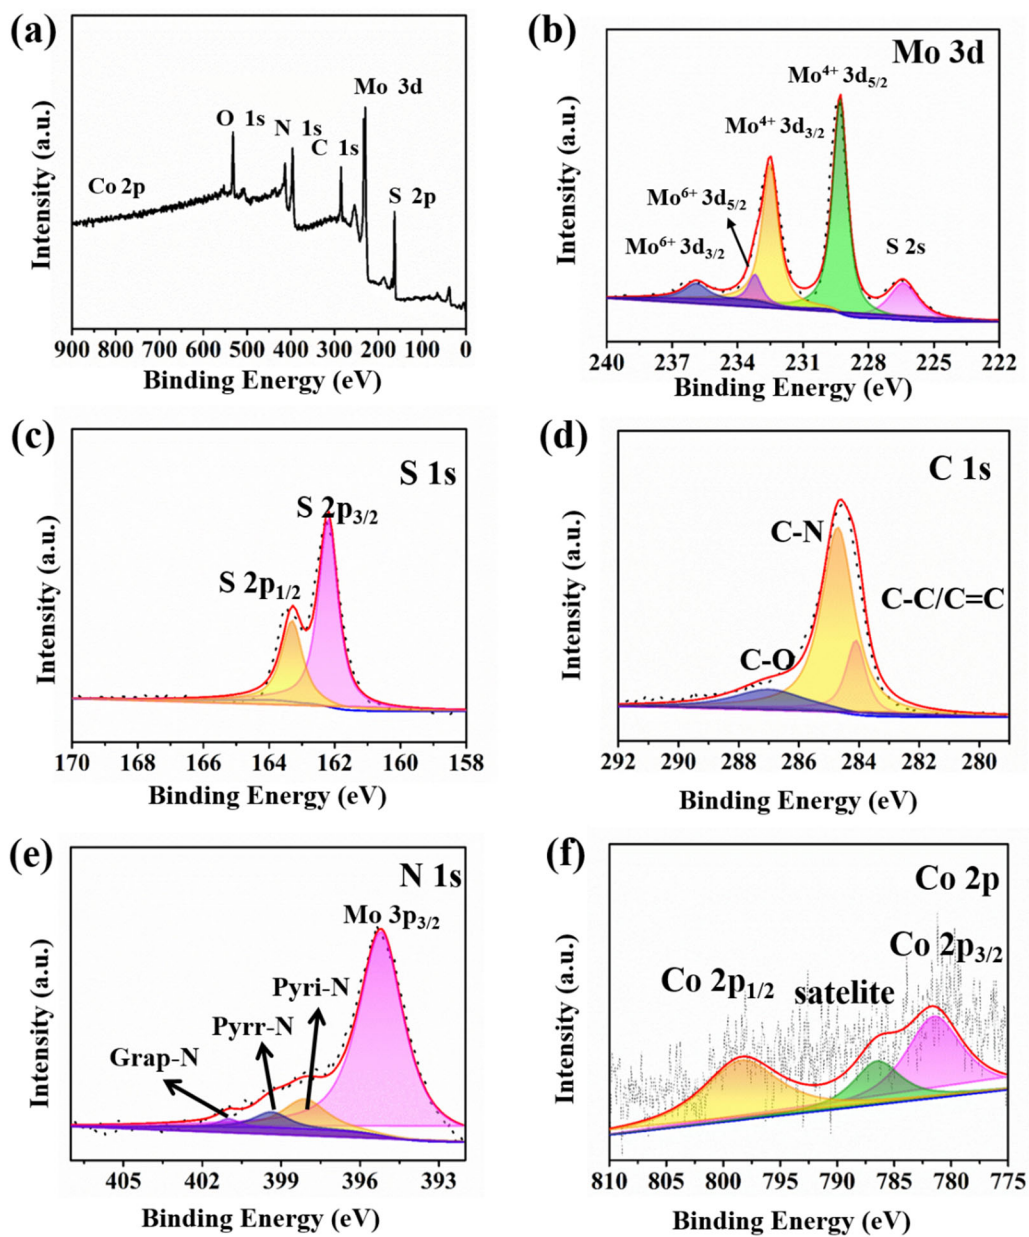

**Figure S12.** (a) XPS survey spectrum of the MoS<sub>2</sub>@Co-N-C NSs. High-resolution (b) Mo 3d, (c) S 1s, (d) C 1s, (e) N 1s and (f) Co 2p XPS spectra, respectively.

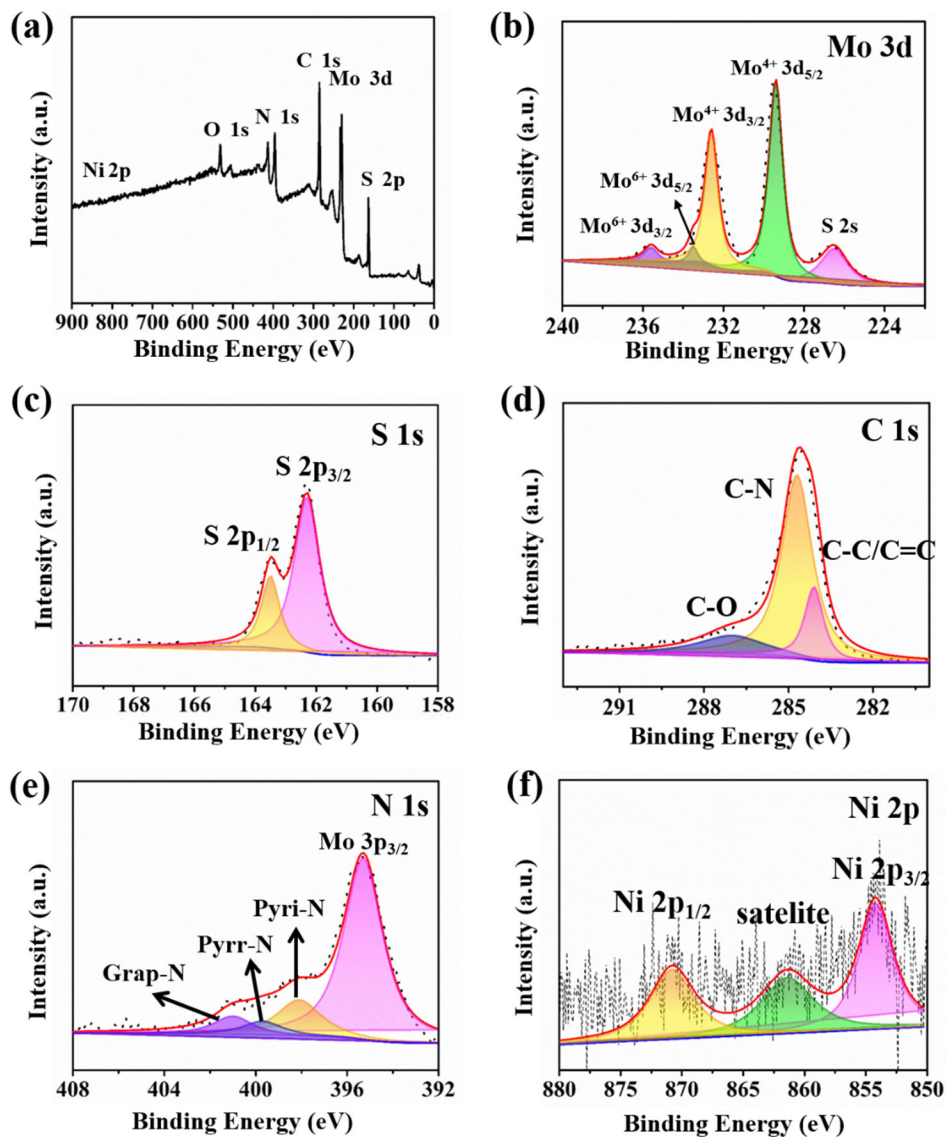

**Figure S13.** (a) XPS survey spectrum of the MoS<sub>2</sub>@Ni-N-C NSs. High-resolution (b) Mo 3d, (c) S 1s, (d) C 1s, (e) N 1s and (f) Ni 2p XPS spectra, respectively.

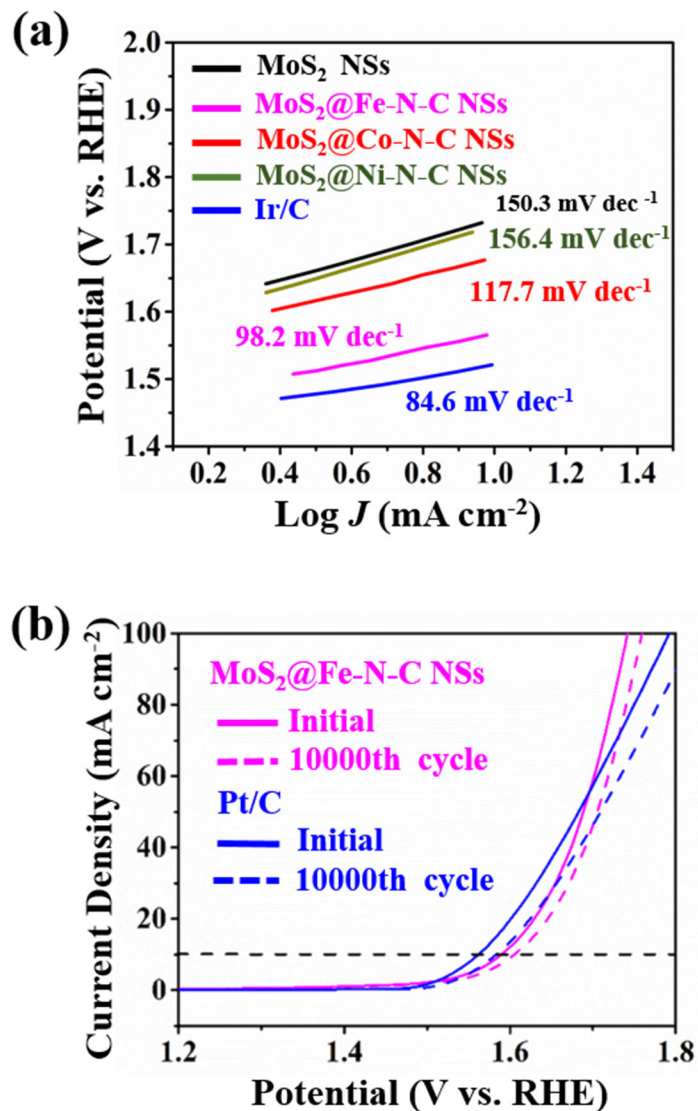

**Figure S14.** (a) The corresponding OER Tafel slopes of MoS<sub>2</sub> NSs, MoS<sub>2</sub>@Fe-N-C NSs, MoS<sub>2</sub>@Co-N-C NSs, MoS<sub>2</sub>@Ni-N-C NSs, and Ir/C, respectively. (b) Polarization curves of MoS<sub>2</sub>@Fe-N-C NSs and Ir/C before and after 10000 potential sweeps at 50 mV s<sup>-1</sup> for OER test.

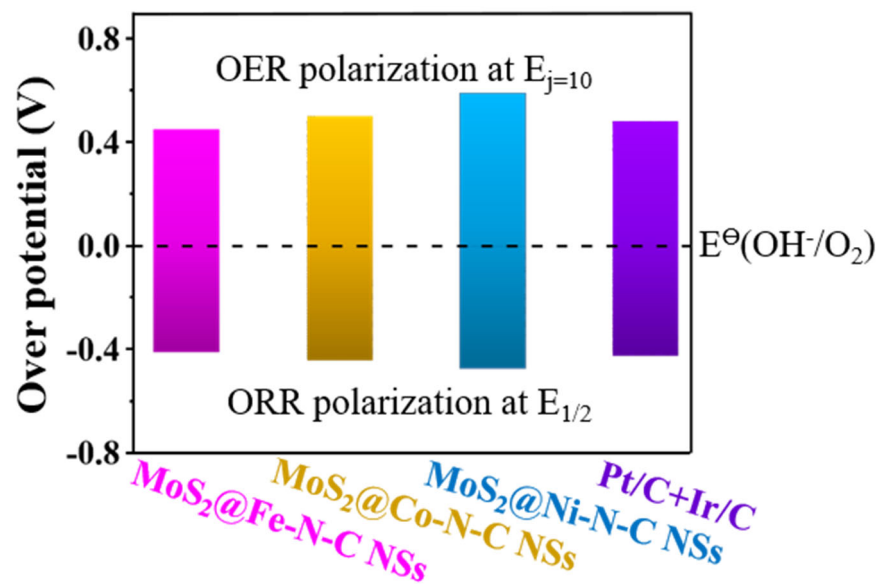

**Figure S15.** Comparison of oxygen bifunctional catalytic performances of MoS<sub>2</sub>@Fe-N-C NSs, MoS<sub>2</sub>@Co-N-C NSs, MoS<sub>2</sub>@Ni-N-C NSs, and Pt/C+Ir/C

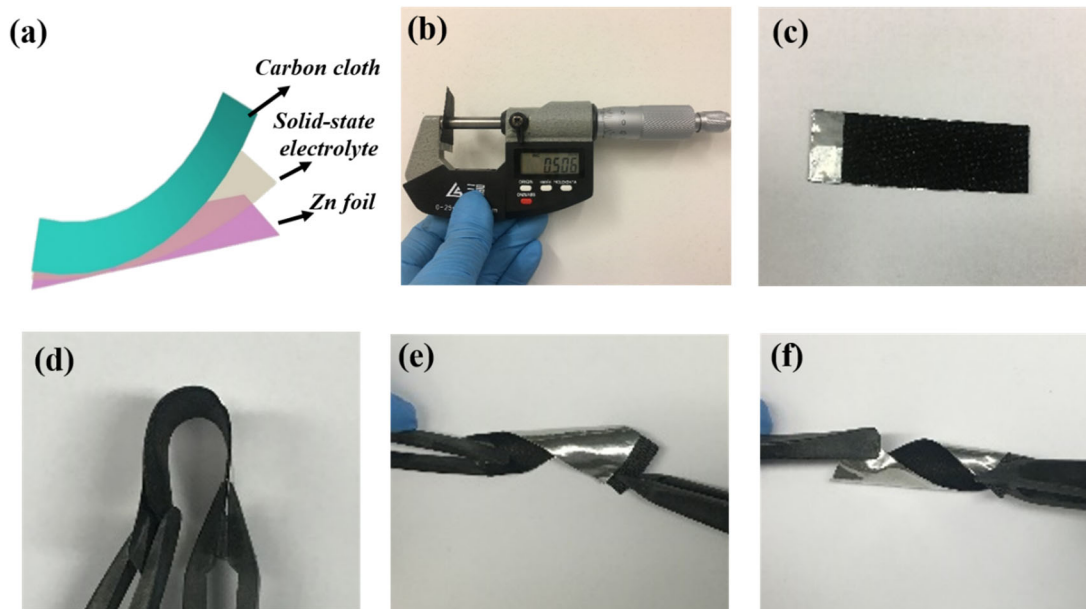

**Figure S16.** (a) Schematic diagram of a flexible all-solid-state zinc-air battery (ZAB). (b) Digital image showing the thickness of the all-solid-state ZAB (0.506 cm), measured by micrometer caliper. Digital images of (c) flat ZAB, (d) bended ZAB (180°), (e) twisted ZAB, and (f) heavily twisted ZAB, respectively.

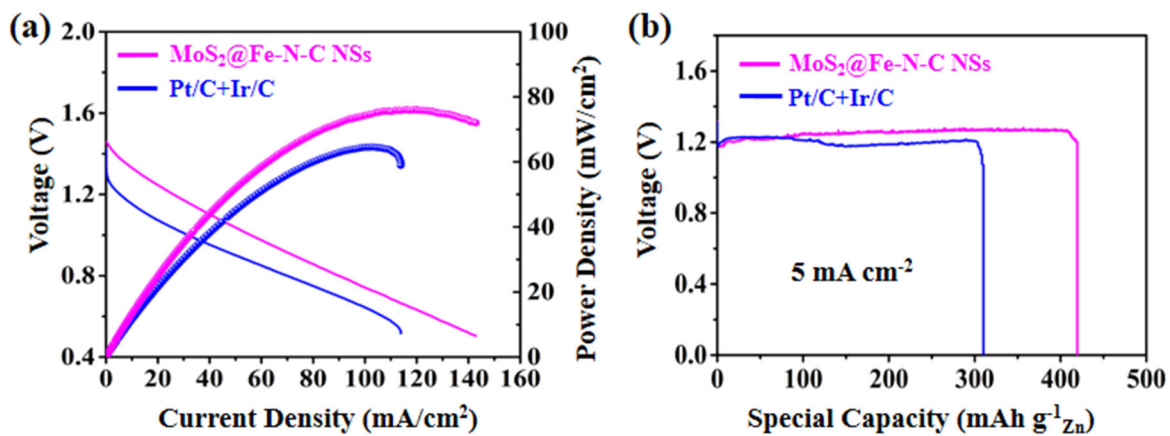

**Figure S17.** (a) Discharging polarization curves and the corresponding power densities. (b) The voltage–capacity curves of Zn–air batteries based on the MoS<sub>2</sub>@Fe-N-C NSs and Pt/C+Ir/C cathode catalysts at the current density of 5 mA cm<sup>-2</sup>.

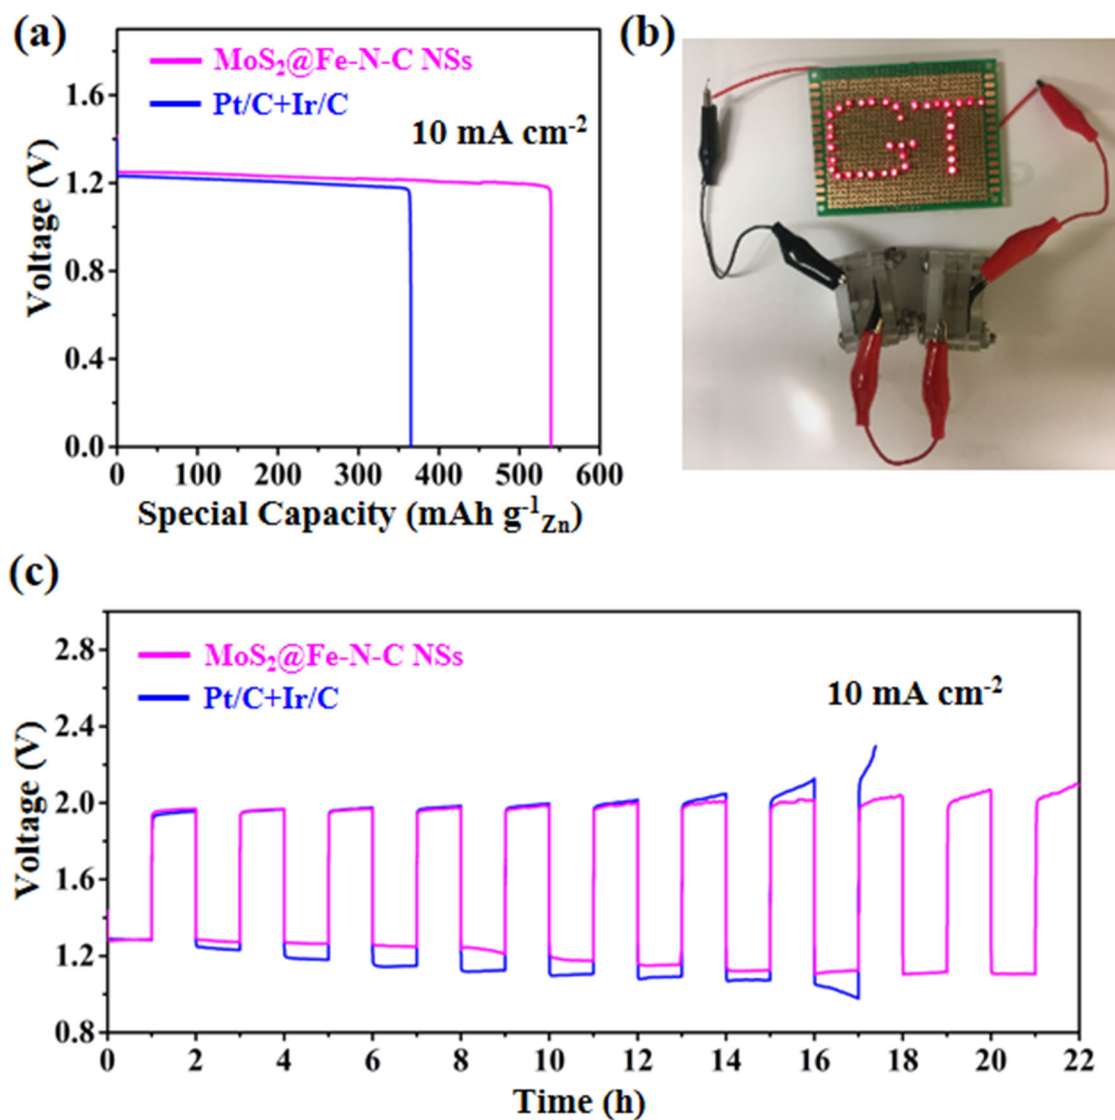

**Figure S18.** (a) The voltage–capacity curves of Zn–air batteries (ZABs) based on  $\text{MoS}_2@\text{Fe-N-C NSs}$  and  $\text{Pt/C+Ir/C}$  cathode catalysts at the current density of  $10 \text{ mA cm}^{-2}$ . (b) Digital image of two ZABs in series that light an array of red LEDs. (c) The stability curves of ZABs based on  $\text{MoS}_2@\text{Fe-N-C NSs}$  and  $\text{Pt/C+Ir/C}$  cathode catalysts at the current density of  $10 \text{ mA cm}^{-2}$ .

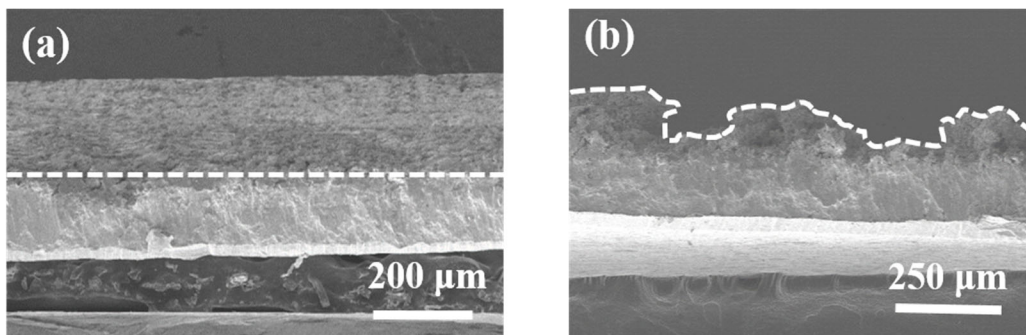

**Figure S19.** SEM images of zinc foil after the cycling stability test of (a) MoS<sub>2</sub>@Fe-N-C NSs-based ZAB and (b) Pt/C+Ir/C-based ZAB after 18 h cycling.



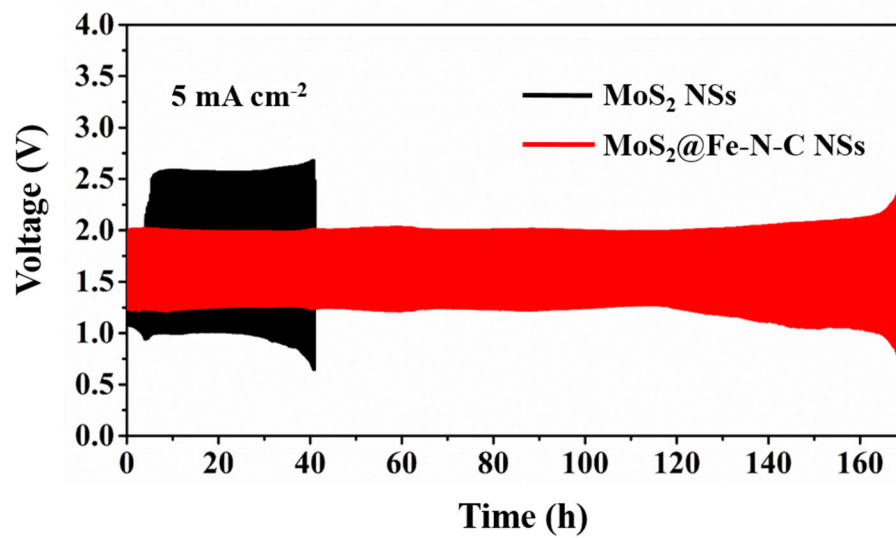

**Figure S20.** The stability curves of the MoS<sub>2</sub>-based ZAB and MoS<sub>2</sub>@Fe-N-C-based ZAB at a constant current density of  $5 \text{ mA cm}^{-2}$ .

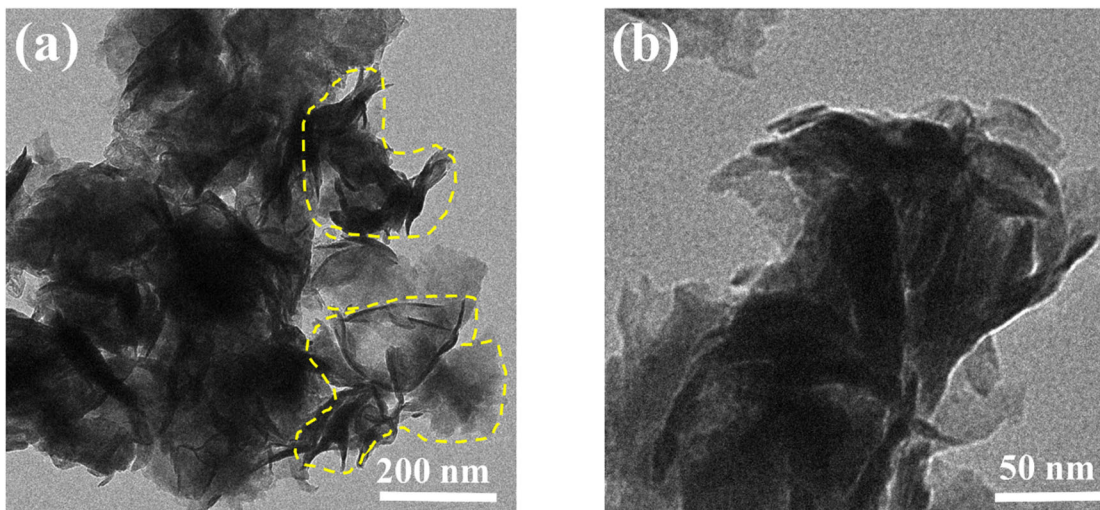

**Figure S21.** TEM image of MoS<sub>2</sub> cathode after being cycled for 120 times, where the collapsed nanospheres are marked with yellow dashed circles.

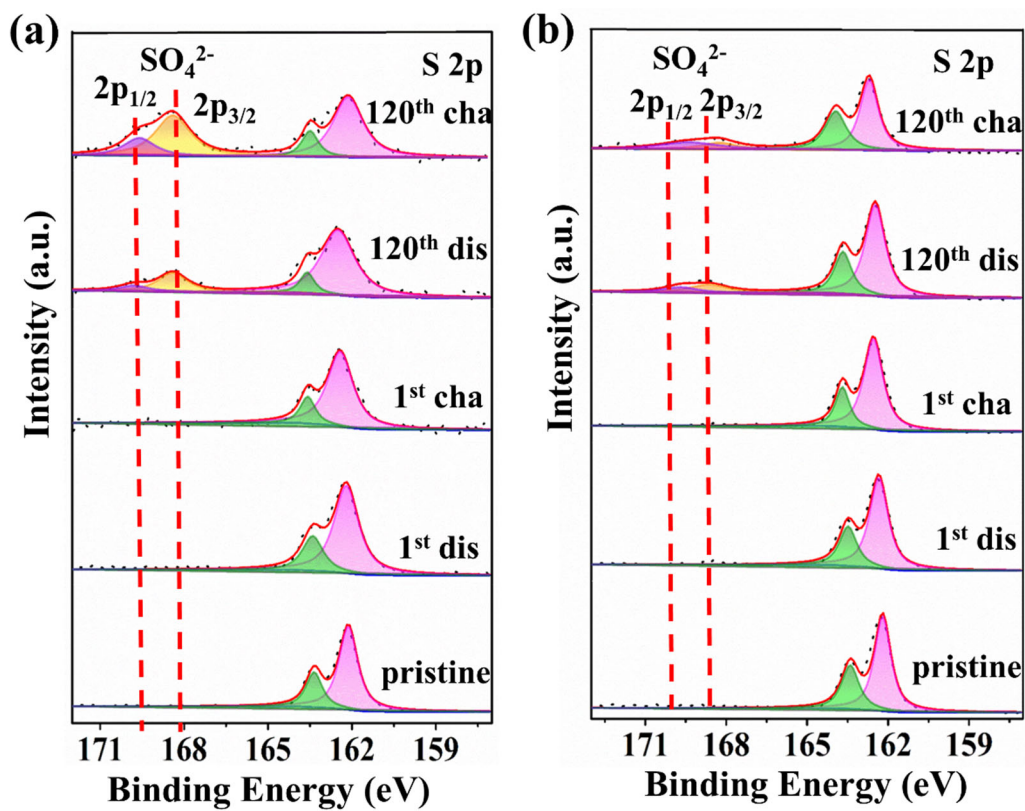

**Figure S22.** High-resolution S 2p XPS spectra of (a) MoS<sub>2</sub> cathode and (b) MoS<sub>2</sub>@Fe-N-C cathode obtained from the 1st discharge, 1st charge, 120th discharge, and 120th discharge processes.

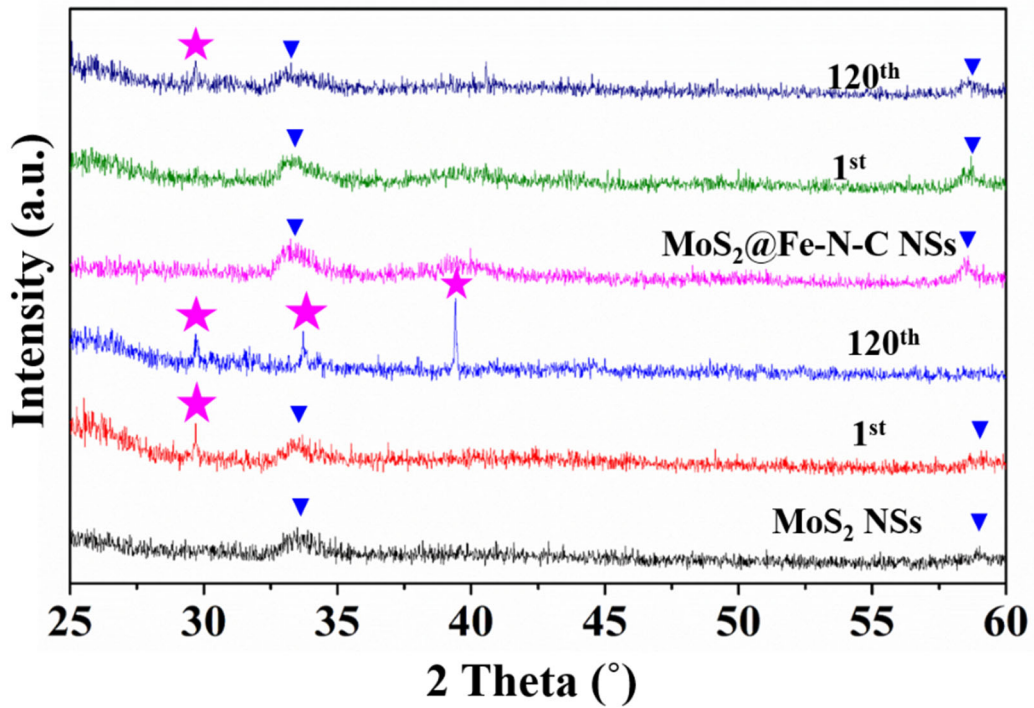

**Figure S23.** XRD patterns of the MoS<sub>2</sub>-based electrodes and the MoS<sub>2</sub>@Fe-N-C-based electrodes obtained from the 1st and 120th cycles (Stars: characteristic diffraction peaks of MoO<sub>3</sub>. Triangle: characteristic diffraction peaks of MoO<sub>3</sub> of MoS<sub>2</sub>).

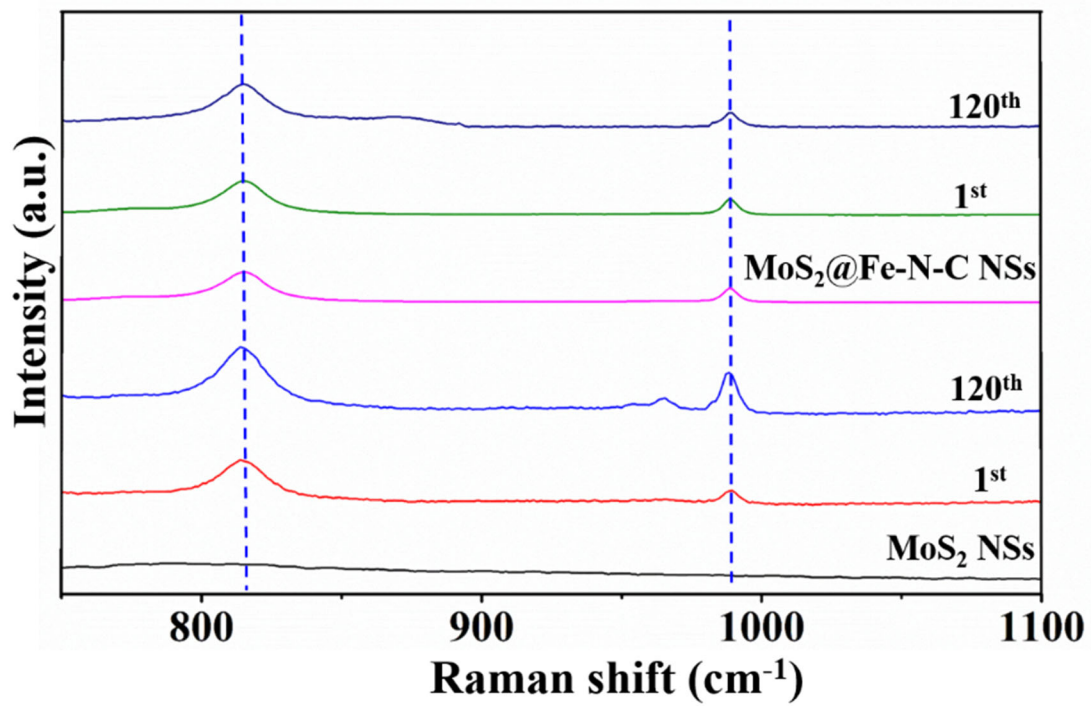

**Figure S24.** Raman spectra of the MoS<sub>2</sub>-based electrodes and the MoS<sub>2</sub>@Fe-N-C-based electrodes obtained from the 1<sup>st</sup> and 120<sup>th</sup> cycles.

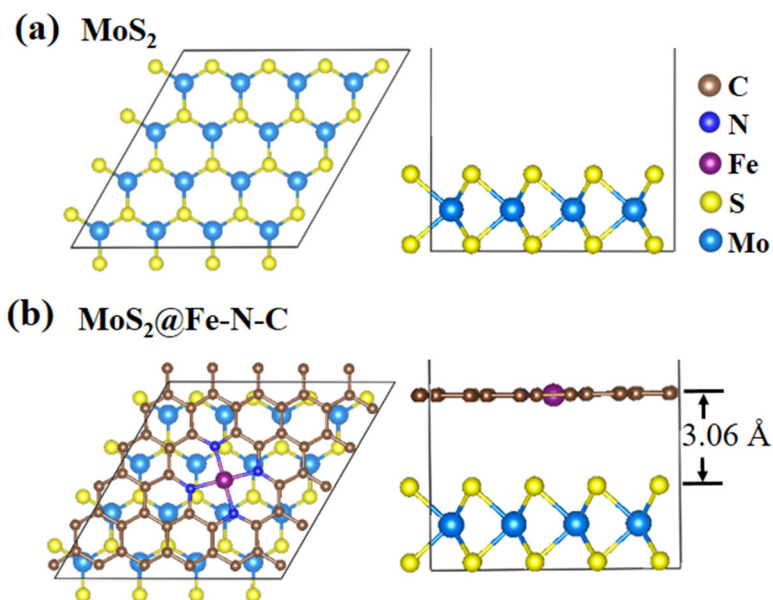

**Figure S25.** Top view and side view of structural models of (a)  $\text{MoS}_2$  and (b)  $\text{MoS}_2@Fe-N-C$ , respectively.

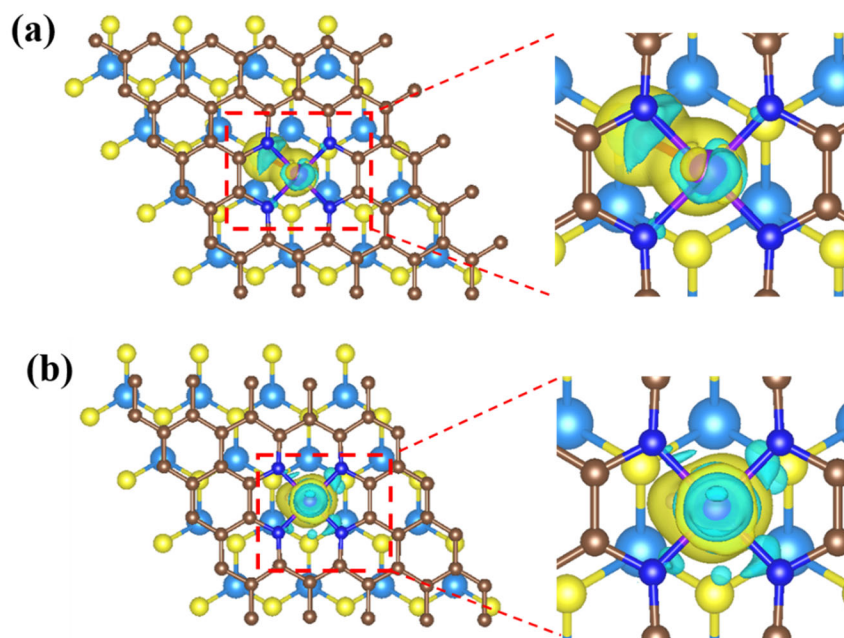

**Figure S26.** Top view of electron density difference plots for MoS<sub>2</sub>@Fe-N-C with adsorbed (a) O<sub>2</sub> and (b) OH, respectively. The isosurface value of yellow and cyan regions are 0.003 Bohr<sup>-3</sup>. Yellow contours represent the charge accumulations, and cyan contours denote the charge depletion.

**Table S1.** Structural parameters of MoS<sub>2</sub>@Fe-N-C NSs, Fe foil, and Fe<sub>2</sub>O<sub>3</sub> extracted from the EXAFS fitting. ( $S_0^2=0.72$ )

| Samples                        | Shell  | $N^a$ | $R(\text{\AA})^b$ | $\sigma^2 \times 10^3(\text{\AA}^2)^c$ | $\Delta E_0(\text{eV})^d$ | $R$ factor |
|--------------------------------|--------|-------|-------------------|----------------------------------------|---------------------------|------------|
| Fe foil                        | Fe-Fe1 | 8     | 2.47              | 4.9                                    | 4.5                       | 0.004      |
|                                | Fe-Fe2 | 6     | 2.84              | 6.2                                    |                           |            |
| Fe <sub>2</sub> O <sub>3</sub> | Fe-O1  | 3     | 1.99              | 5.4                                    | 2.6                       | 0.015      |
|                                | Fe-O2  | 3     | 1.92              | 4.5                                    |                           |            |
| MoS <sub>2</sub> @Fe-N-C NSs   | Fe-N   | 4     | 2.02              | 4.3                                    | 2.7                       | 0.004      |

<sup>a</sup> $N$ : coordination number; <sup>b</sup> $R$ : bond distance (the bond length between the central atoms and surrounding coordination atoms); <sup>c</sup> $\sigma^2$ : Debye-Waller factors (a measure of thermal and static disorder in absorber-scatterer distance); <sup>d</sup>  $\Delta E_0$ : the inner potential correction.  $R$  factor: goodness of fitting.



**Table S2.** Gibbs free energies of four elementary steps in ORR processes for MoS<sub>2</sub>, MoS<sub>2</sub>@Fe-N-C surface (denoted MoS<sub>2</sub>@Fe-N-C Sur), and MoS<sub>2</sub>@Fe-N-C interface (denoted MoS<sub>2</sub>@Fe-N-C Int), respectively.

|                              | $\Delta G_1 (eV)$ | $\Delta G_2 (eV)$ | $\Delta G_3 (eV)$ | $\Delta G_4 (eV)$ |
|------------------------------|-------------------|-------------------|-------------------|-------------------|
| MoS <sub>2</sub>             | -0.173            | -2.650            | 0.760             | 1.337             |
| MoS <sub>2</sub> @Fe-N-C Sur | -0.847            | -2.119            | -0.957            | -0.997            |
| MoS <sub>2</sub> @Fe-N-C Int | -0.905            | -1.857            | -1.126            | -1.032            |

**Table S3.** Comparison of performance of all-solid-state ZABs.

| Catalysts                                 | Loading density (mg cm <sup>-2</sup> ) | Open circuit potential (V) | Power density (mW cm <sup>-2</sup> ) | Cycling density (mA cm <sup>-2</sup> ) | Cycling stability                                              | Refs             |
|-------------------------------------------|----------------------------------------|----------------------------|--------------------------------------|----------------------------------------|----------------------------------------------------------------|------------------|
| <b>MoS<sub>2</sub>@Fe-N-C NSs</b>         | <b>0.25</b>                            | <b>1.47</b>                | <b>78</b>                            | <b>5</b>                               | <b>20 min/cycle for 50 cycles without visible voltage loss</b> | <b>This work</b> |
| Mo-N/C@MoS <sub>2</sub>                   | 1                                      | 1.34                       | -                                    | 2                                      | -                                                              | (6)              |
| NC-Co SA                                  | Free-standing                          | 1.41                       | 31.0                                 | 1                                      | 20 min/cycle for 30 cycles without visible voltage loss        | (7)              |
| Co <sub>3</sub> O <sub>4</sub> @N-CNMA/CC | 1.82                                   | 1.461                      | 65                                   | 1                                      | 20 min/cycle for 24 cycles without visible voltage loss        | (8)              |
| CC-AC                                     | Free-standing                          | 1.37                       | 52.3                                 | 1                                      | 20 min/cycle for 50 cycles without visible voltage loss        | (9)              |
| N-GCNT/FeCo                               | 2                                      | 1.25                       | 97.8                                 | 100                                    | 10 min/cycle for 72 cycles without visible voltage loss        | (10)             |
| Fe-N <sub>x</sub> -C                      | -                                      | 1.49                       | -                                    | 1                                      | Cycling about 120 h without visible voltage loss               | (11)             |
| FeN <sub>x</sub> -PNC                     | -                                      | 1.43                       | 110                                  | 5                                      | 11 min/cycle for 220 cycles without visible voltage loss       | (12)             |

## Supplementary movies

This supplementary material includes 1 movie file. The detail of this movie is as follows:

### Movie S1. Bending test of two flexible ZABs in series with LED lights on.

## References

1. Kresse G & Hafner J (1993) Ab initio molecular dynamics for open-shell transition metals. *Phys. Rev. B* 48(17):13115-13118.
2. Perdew JP, Burke K, & Ernzerhof M (1996) Generalized Gradient Approximation Made Simple. *Phys. Rev. Lett.* 77(18):3865-3868.
3. Blöchl PE (1994) Projector augmented-wave method. *Phys. Rev. B* 50(24):17953-17979.
4. Nørskov JK, *et al.* (2004) Origin of the Overpotential for Oxygen Reduction at a Fuel-Cell Cathode. *J. Phys. Chem. B* 108(46):17886-17892.
5. Man IC, *et al.* (2011) Universality in Oxygen Evolution Electrocatalysis on Oxide Surfaces. *ChemCatChem* 3(7):1159-1165.
6. Amiin IS, *et al.* (2017) Multifunctional Mo-N/C@MoS<sub>2</sub> Electrocatalysts for HER, OER, ORR, and Zn-Air Batteries. *Adv. Funct. Mater.* 27(44):1702300.
7. Zang W, *et al.* (2018) Single Co Atoms Anchored in Porous N-Doped Carbon for Efficient Zinc–Air Battery Cathodes. *ACS Catal.* 8(10):8961-8969.
8. Zhong Y, *et al.* (2019) Hierarchical Co<sub>3</sub>O<sub>4</sub> Nano-Micro Arrays Featuring Superior Activity as Cathode in a Flexible and Rechargeable Zinc-Air Battery. *Adv. Sci.* 6(11):1802243.

9. Kordek K, *et al.* (2019) Two-Step Activated Carbon Cloth with Oxygen-Rich Functional Groups as a High-Performance Additive-Free Air Electrode for Flexible Zinc-Air Batteries. *Adv. Energy Mater.* 9(4):1802936.
10. Su C-Y, *et al.* (2017) Atomic Modulation of FeCo-Nitrogen-Carbon Bifunctional Oxygen Electrodes for Rechargeable and Flexible All-Solid-State Zinc-Air Battery. *Adv. Energy Mater.* 7(13):1602420.
11. Han J, *et al.* (2019) Single-Atom Fe-N<sub>x</sub>-C as an Efficient Electrocatalyst for Zinc–Air Batteries. *Adv. Funct. Mater.* 29(41):1808872.
12. Ma L, *et al.* (2018) Single-Site Active Iron-Based Bifunctional Oxygen Catalyst for a Compressible and Rechargeable Zinc-Air Battery. *ACS Nano* 12(2):1949-1958.
